# Supplementary material
Source: Springer Nature journal article supplement (https://www.springermedizin.de/resource/supplementary/12881_2009_672_MOESM1_ESM.pdf/9450858)

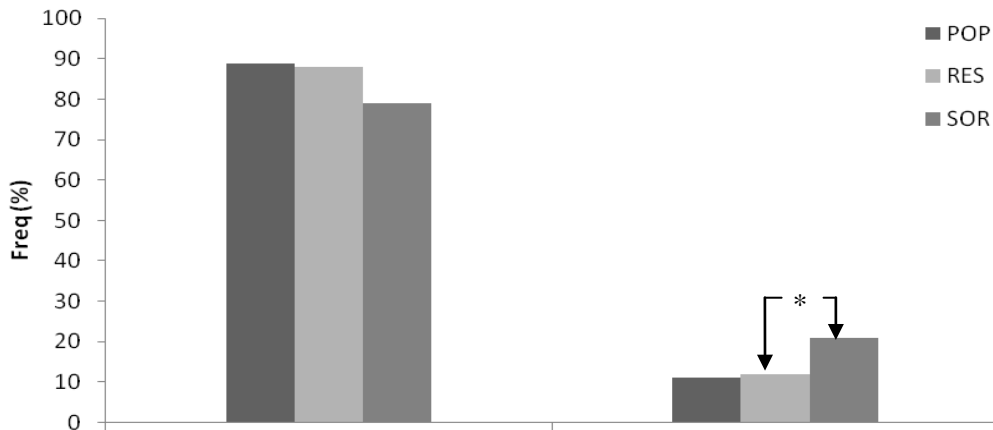

|     |    |    |
|-----|----|----|
| POP | 89 | 11 |
| RES | 88 | 12 |
| SOR | 79 | 21 |

Haplotype

Supplement: MOESM1 [file 9450858]
